# Supplementary figures and images for: The Interplay of Cholesterol and Ligand Binding in hTSPO from Classical Molecular Dynamics Simulations
Source: MDPI journal article supplement (doi:10.3390/molecules26051250), 2021-02-26

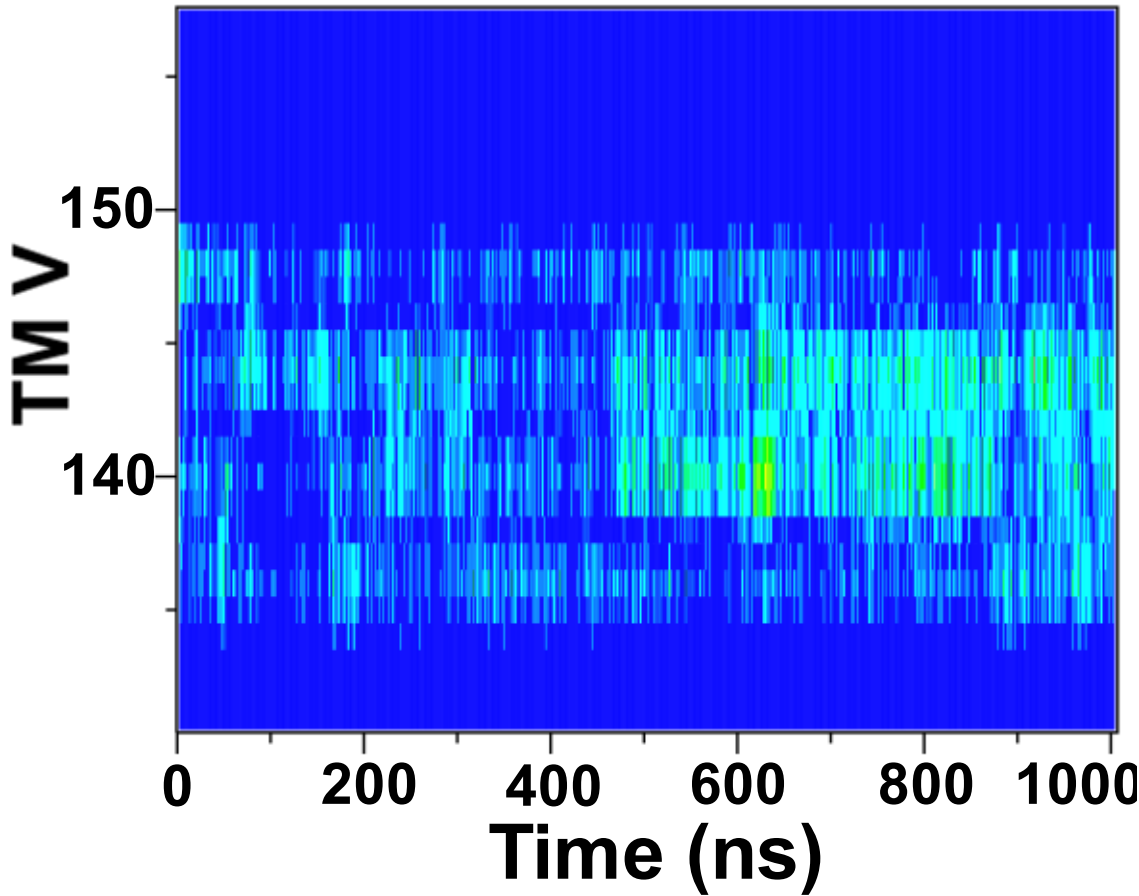

Supplement: s1 [file s1]

TM II

70

60

50

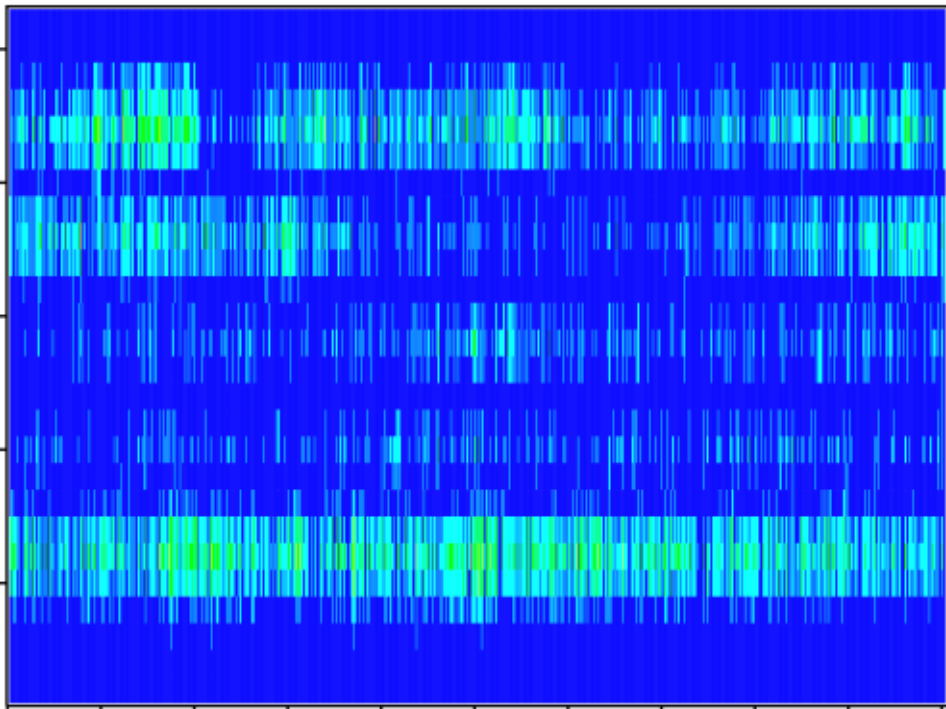

Supplement: s1 [file s1]

# *h*TSP0-PK11195

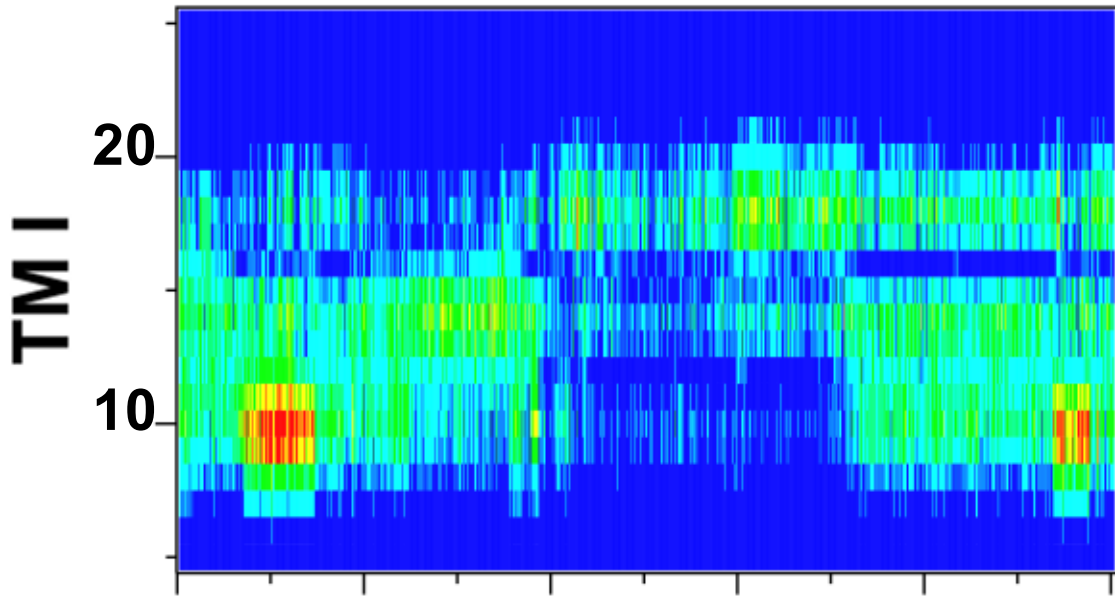

Supplement: s1 [file s1]

# *h*TSPO

Residue index

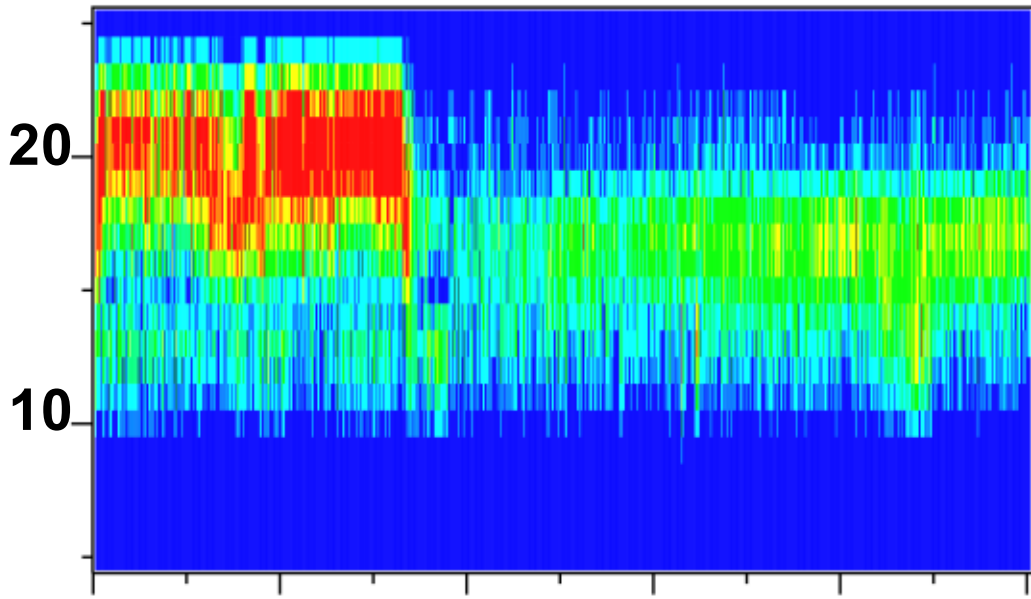

Supplement: s1 [file s1]

**Residue index**

120

110

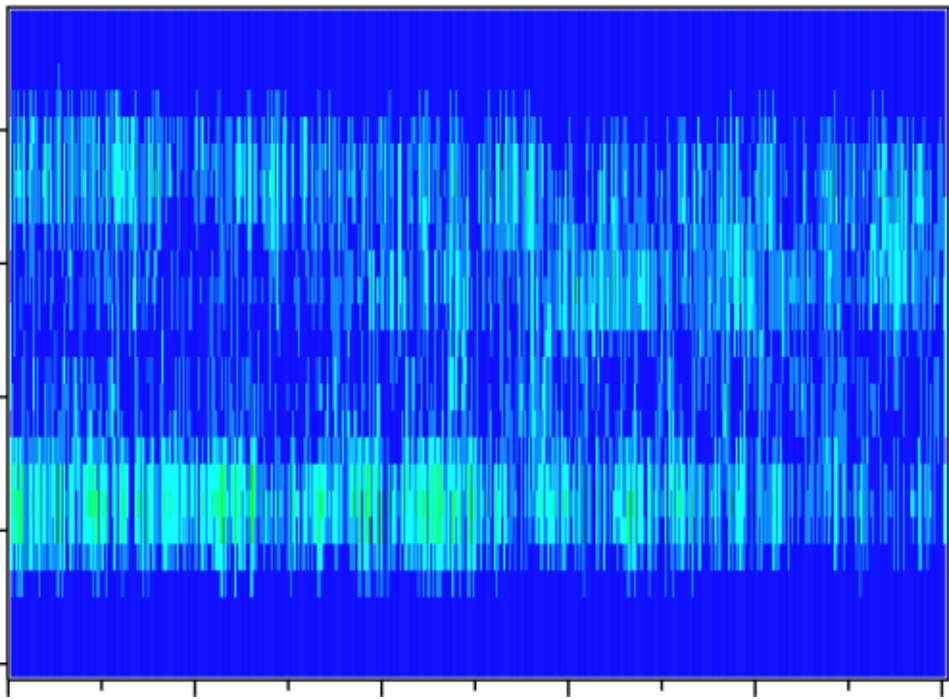

Supplement: s1 [file s1]

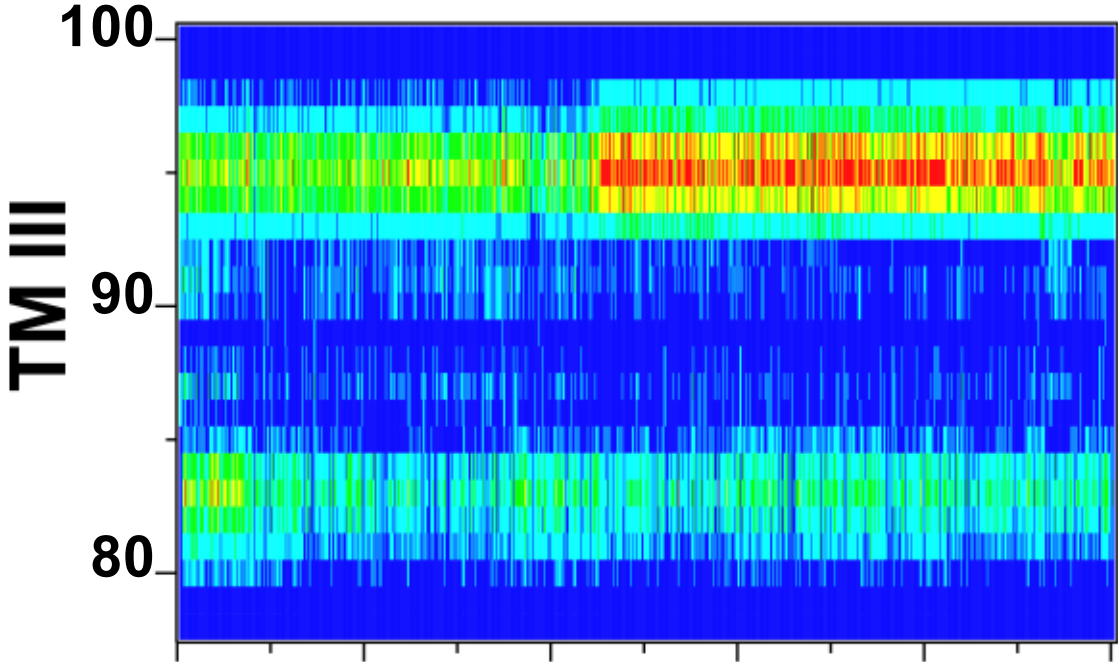

Supplement: s1 [file s1]

**Residue index**

150

140

0

200

400

600

800

1000

**Time (ns)**

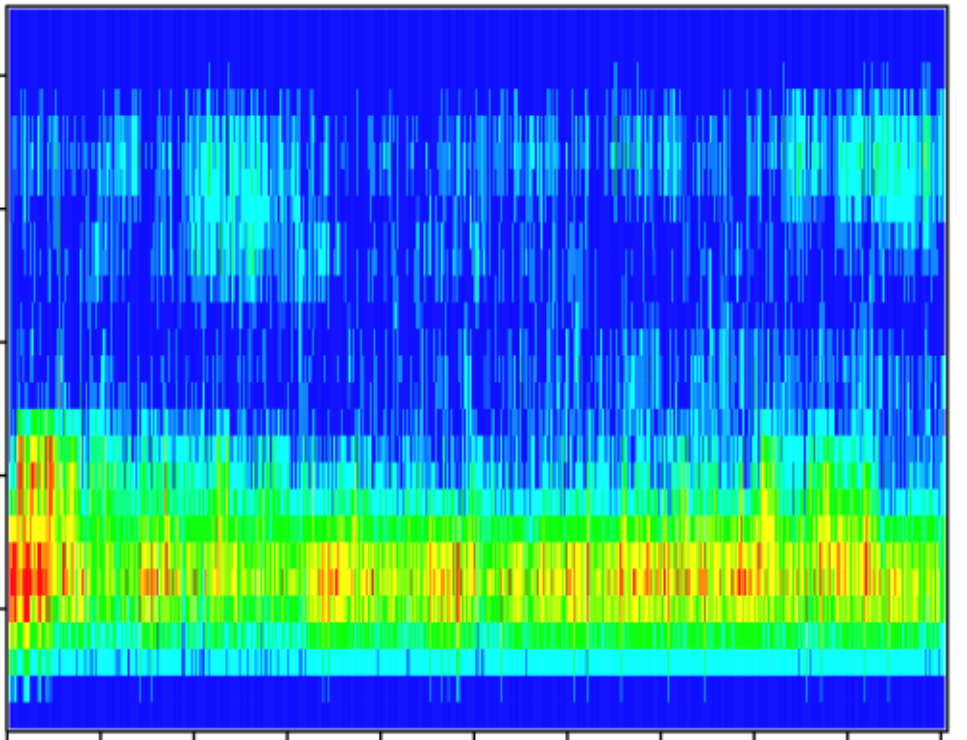

Supplement: s1 [file s1]

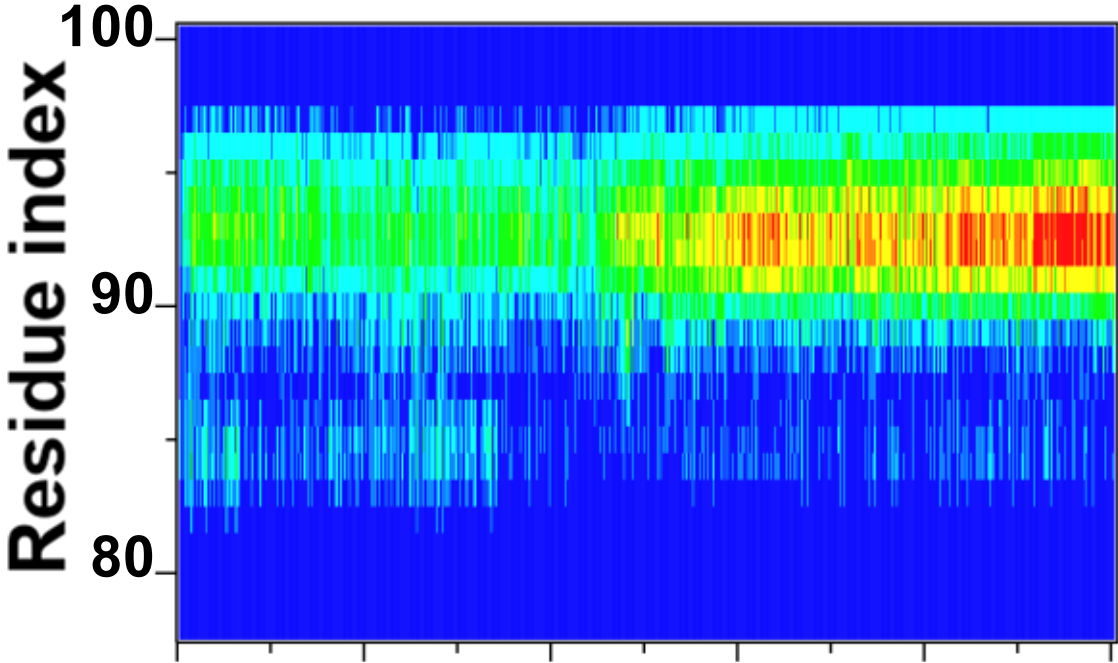

Supplement: s1 [file s1]

**Residue index**

70

60

50

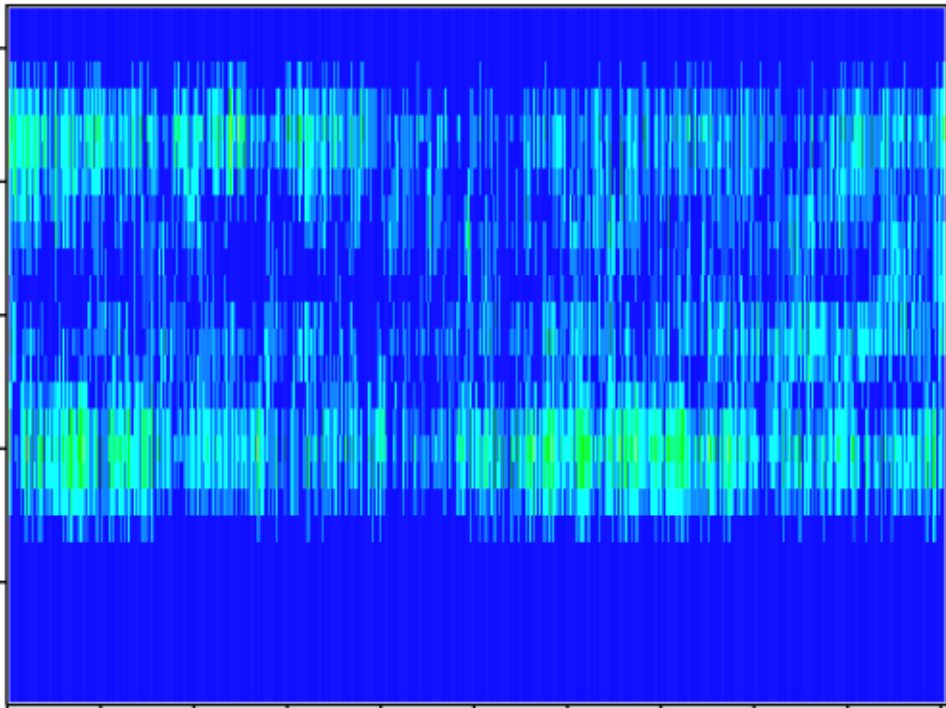

Supplement: s1 [file s1]

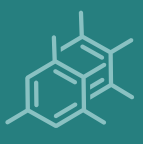

*molecules*

Supplement: s1 [file s1]

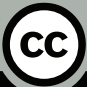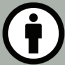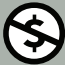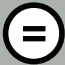

BY

NC

ND

Supplement: s1 [file s1]

**TM IV**

**120**

**110**

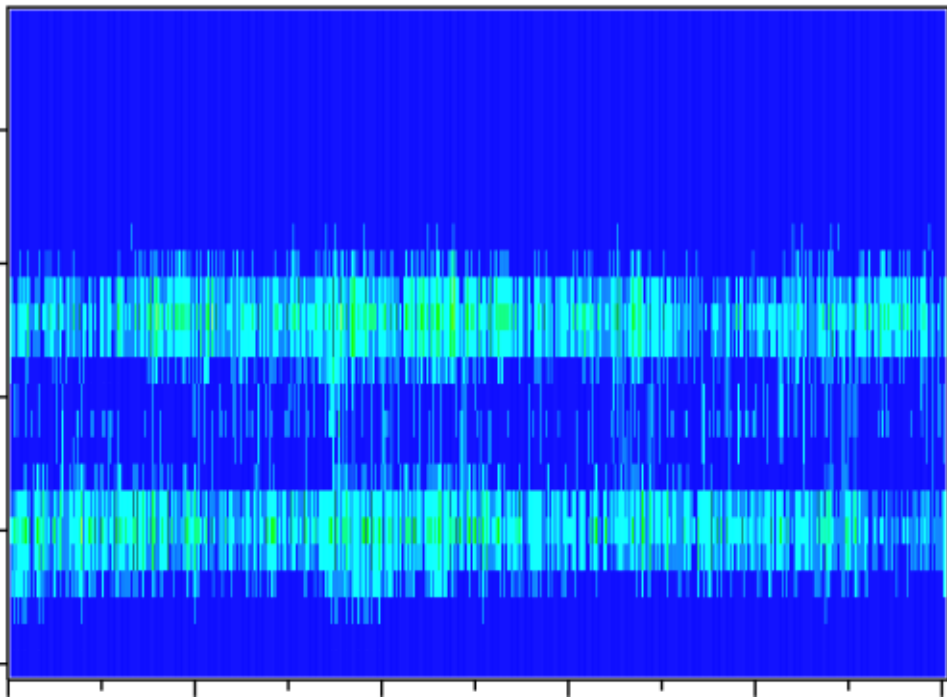

Supplement: s1 [file s1]

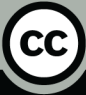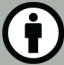

BY

Supplement: s1 [file s1]

0° 6° 12° 18° 24°

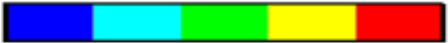

Supplement: s1 [file s1]
